# Supplementary material
Source: PubMed Central journal article supplement (PMC4659361)
Supplement: NIHMS737853-supplement-suppl_table_1.pdf [file NIHMS737853-supplement-suppl_table_1.pdf]

**Supplemental Table 1. Patient and Tumor Characteristics**

| <b>Variable</b>                     | <b>N (365)</b>   | <b>%</b> |
|-------------------------------------|------------------|----------|
| <b>Age, y, median (IQR)</b>         | 63.4 (54.7-72.0) |          |
| <b>Sex</b>                          |                  |          |
| Female                              | 206              | 56.4     |
| Male                                | 159              | 43.6     |
| <b>Tumor Size, cm, median (IQR)</b> | 3.8 (2.5-6.0)    |          |
| <b>Site</b>                         |                  |          |
| Stomach                             | 283              | 77.5     |
| Small Intestine                     | 56               | 15.3     |
| Colon/Rectum                        | 2                | 0.5      |
| Others                              | 24               | 6.6      |
| <b>Mitotic rate group *</b>         |                  |          |
| ≤5/50 HPF                           | 306              | 86.4     |
| 6-10/50 HPF                         | 28               | 7.9      |
| >10/50 HPF                          | 20               | 5.6      |
| <b>Margin **</b>                    |                  |          |
| R0                                  | 349              | 95.9     |
| R1                                  | 15               | 4.1      |
| <b>Tumor rupture</b>                | 4                | 1.1      |
| <b>Mutation Testing</b>             |                  |          |
| Not Tested                          | 334              | 91.5     |
| KIT Exon 11                         | 21               | 5.7      |
| KIT Exon 9                          | 2                | 0.6      |
| KIT Wild Type                       | 4                | 1.1      |
| Other Mutations                     | 4                | 1.1      |

**IQR – Interquartile range, TKI – Tyrosine kinase inhibitor****\*N=354 \*\*N=364**
