# Supplementary material
Source: PubMed Central journal article supplement (PMC4659361)
Supplement: NIHMS737853-supplement-supple_table_2.pdf [file NIHMS737853-supplement-supple_table_2.pdf]

**Supplemental Table 2. Concordance probabilities of the nomogram compared with the NIH criteria, modified NIH criteria, Miettinen criteria and MSKCC nomogram**

|                       | <b>Concordance</b> |
|-----------------------|--------------------|
| <b>Nomogram</b>       | 0.77               |
| <b>NIH</b>            | 0.73               |
| <b>Modified NIH</b>   | 0.71               |
| <b>Miettinen</b>      | 0.78               |
| <b>MSKCC nomogram</b> | 0.71               |
